# Supplementary material
Source: Springer Nature journal article supplement (https://www.springermedizin.de/resource/supplementary/12874_2004_101_MOESM4_ESM.pdf/9433768)
Supplement: MOESM4 [file 9433768]

|                                                                                                                                                                                                |                                                                                                                                                                          | The Sample size ranges from 8 to 15.                                                                                         | The Sample size ranges from 16 to 35.                                                                                                     | The Sample size ranges from 36 to 72.                                                                                            | The Sample size ranges from 73 to 100 and beyond.                             |
|------------------------------------------------------------------------------------------------------------------------------------------------------------------------------------------------|--------------------------------------------------------------------------------------------------------------------------------------------------------------------------|------------------------------------------------------------------------------------------------------------------------------|-------------------------------------------------------------------------------------------------------------------------------------------|----------------------------------------------------------------------------------------------------------------------------------|-------------------------------------------------------------------------------|
| <b>Approximation of the mean.</b> Each number in this table represents the average relative error of estimating the sample mean in 200 samples from an Exponential distribution.               | <b>LEGEND:</b><br>The median approximation is represented by black crosses, Formula (4) is represented by blue boxes, and Formula (5) by red diamonds.                   |                                                                                                                              |                                                                                                                                           |                                                                                                                                  |                                                                               |
|                                                                                                                                                                                                | <b>Median</b>                                                                                                                                                            | 27.67 %                                                                                                                      | 28.96 %                                                                                                                                   | 29.73 %                                                                                                                          | 30.21 %                                                                       |
|                                                                                                                                                                                                | <b>Formula (4)</b>                                                                                                                                                       | 19.91 %                                                                                                                      | 34.77 %                                                                                                                                   | 50.42 %                                                                                                                          | 62.64 %                                                                       |
|                                                                                                                                                                                                | <b>Formula (5)</b>                                                                                                                                                       | 16.75 %                                                                                                                      | 32.35 %                                                                                                                                   | 48.92 %                                                                                                                          | 61.57 %                                                                       |
|                                                                                                                                                                                                | <b>Conclusion</b>                                                                                                                                                        | Formula (5) is estimating the real sample mean with about 17% relative error (the formula (4) and the median are even worse) | All three of these formulas are not very close, but the median approximation starts being the best when the sample size reaches about 21. | The median continues to be the best estimator, separating itself from the other two formulas for the sample sizes in this range. | The averages stabilize and remain fairly steady as the sample size increases. |
| <b>Approximation of the standard deviation.</b> Each number in this table represents the average relative error of estimating the sample mean in 200 samples from an Exponential distribution. | <b>LEGEND:</b><br>The Formula (12) is shown using black crosses, Formula (16) is represented by blue boxes; Range/4 by the green circles, and Range/6 by brown diamonds. |                                                                                                                              |                                                                                                                                           |                                                                                                                                  |                                                                               |
|                                                                                                                                                                                                | <b>Formula (12)</b>                                                                                                                                                      | 11.05 %                                                                                                                      | 15.33 %                                                                                                                                   | 23.81 %                                                                                                                          | 32.61 %                                                                       |
|                                                                                                                                                                                                | <b>Formula (16)</b>                                                                                                                                                      | 9.47 %                                                                                                                       | 21.01 %                                                                                                                                   | 40.67 %                                                                                                                          | 55.93 %                                                                       |
|                                                                                                                                                                                                | <b>Range/4</b>                                                                                                                                                           | 17.38 %                                                                                                                      | 11.00 %                                                                                                                                   | 17.51 %                                                                                                                          | 27.31 %                                                                       |
|                                                                                                                                                                                                | <b>Range/6</b>                                                                                                                                                           | 44.79 %                                                                                                                      | 34.15 %                                                                                                                                   | 23.76 %                                                                                                                          | 17.73 %                                                                       |
| <b>Conclusion</b>                                                                                                                                                                              | Formula (16) is the best estimator of the standard deviation in this range of sample sizes.                                                                              | The Range/4 formula takes over as the best estimate for the variance                                                         | The Range/4 formula is slowly losing its advantage, and the Range/6 formula is closing in after the sample size reaches about 66.         | The Range/6 keeps the lead in accuracy as the sample sizes increase.                                                             |                                                                               |

TABLE 4: Exponential Distribution with the parameter  $\lambda = 10$ .
